# Supplementary material
Source: PubMed Central journal article supplement (PMC1895340)
Supplement: blood_2005-05-1864_1.pdf [file blood_2005-05-1864_1.pdf]

| Exp | $\alpha_E^-$ CD25 <sup>+</sup> vs control<br>p= | $\alpha_E^+$ vs control<br>p= | $\alpha_E^+$ vs $\alpha_E^-$ CD25 <sup>+</sup><br>p= | Treg:target ratio<br>used |
|-----|-------------------------------------------------|-------------------------------|------------------------------------------------------|---------------------------|
| 1   | 0.182                                           | 0.006                         | 0.131                                                | 1:5                       |
| 2   | 0.321                                           | 0.004                         | 0.196                                                | 1:7                       |
| 3   | 0.068                                           | 0.012                         | 0.261                                                | 1:2                       |
| 4   | 0.124                                           | 0.000                         | 0.009                                                | 1:1                       |
| 5   | 0.360                                           | 0.000                         | 0.000                                                | 1:2                       |
