# Supplementary material
Source: PubMed Central journal article supplement (PMC1895340)
Supplement: blood_2005-05-1864_2.pdf [file blood_2005-05-1864_2.pdf]

|                                                              | $\alpha_E^-CD25^-$<br>( $5 \times 10^5$ ) | $\alpha_E^-CD25^-$<br>( $1 \times 10^5$ ) | $\alpha_E^-CD25^+$<br>( $5 \times 10^5$ ) | $\alpha_E^+$<br>( $5 \times 10^5$ ) |
|--------------------------------------------------------------|-------------------------------------------|-------------------------------------------|-------------------------------------------|-------------------------------------|
| KJ1.26 <sup>+</sup> CFSE <sup>-</sup><br>(Tregs and control) | $4.4 \pm 0.91$                            | $1.64 \pm 0.18$                           | $1.24 \pm 0.12$                           | $0.81 \pm 0.02$                     |
| KJ1.26 <sup>+</sup> CFSE <sup>+</sup><br>(responder cells)   | $0.08 \pm 0.02$                           | $0.13 \pm 0.04$                           | $0.09 \pm 0.02$                           | $0.19 \pm 0.01$                     |
